# Supplementary material for: Textile Waste Fibre Regeneration via a Green Chemistry Approach: A Molecular Strategy for Sustainable Fashion
Source: Research Square preprint supplement (doi:10.21203/rs.3.rs-603956/v1), 2021-06-11
Supplement: Supplementary file 1 [file adab933459ea823191125691.docx]

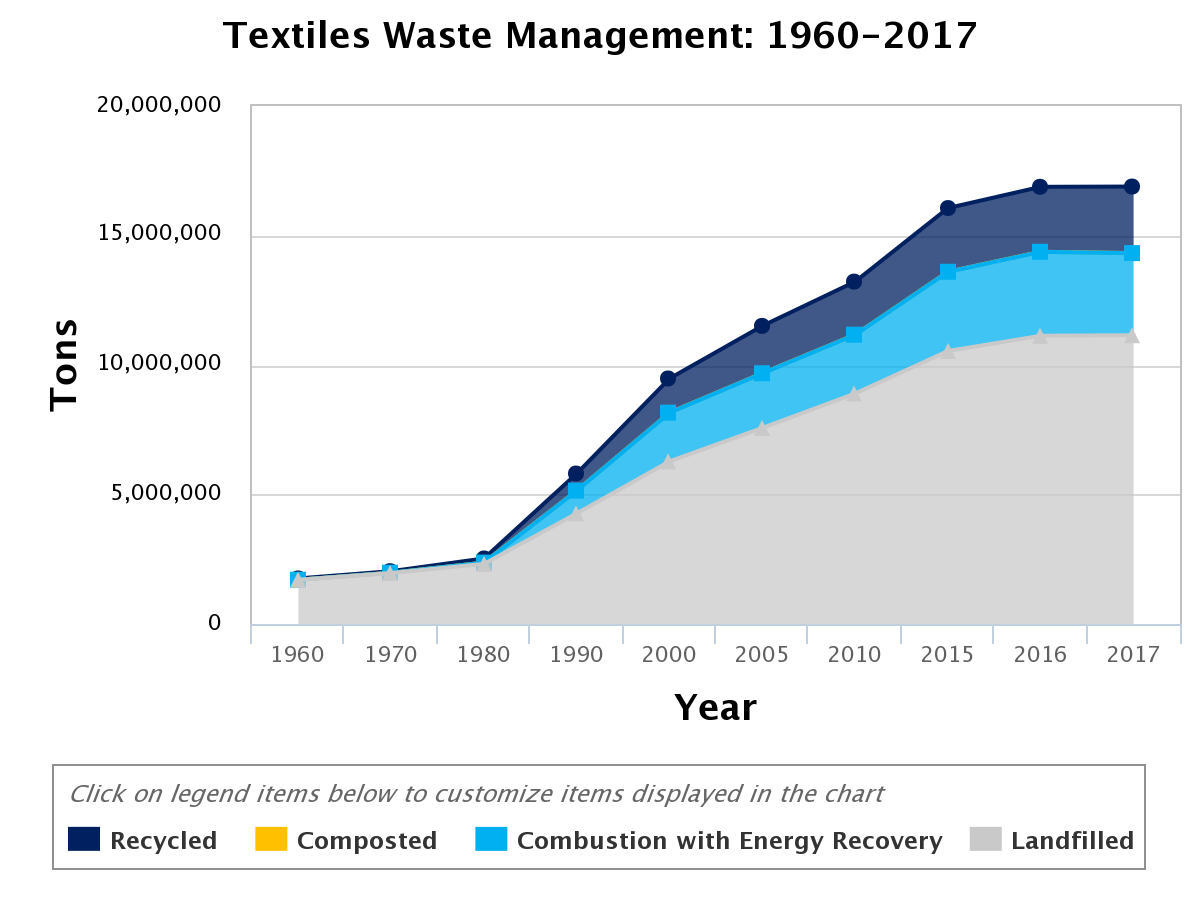


**Supplementary Figure 1.** The total number of tons of textiles generated, recycled, composted, combusted with recovery and landfilled from 1960 to 2017.1 Copyright from United States Environmental Protection Agency.


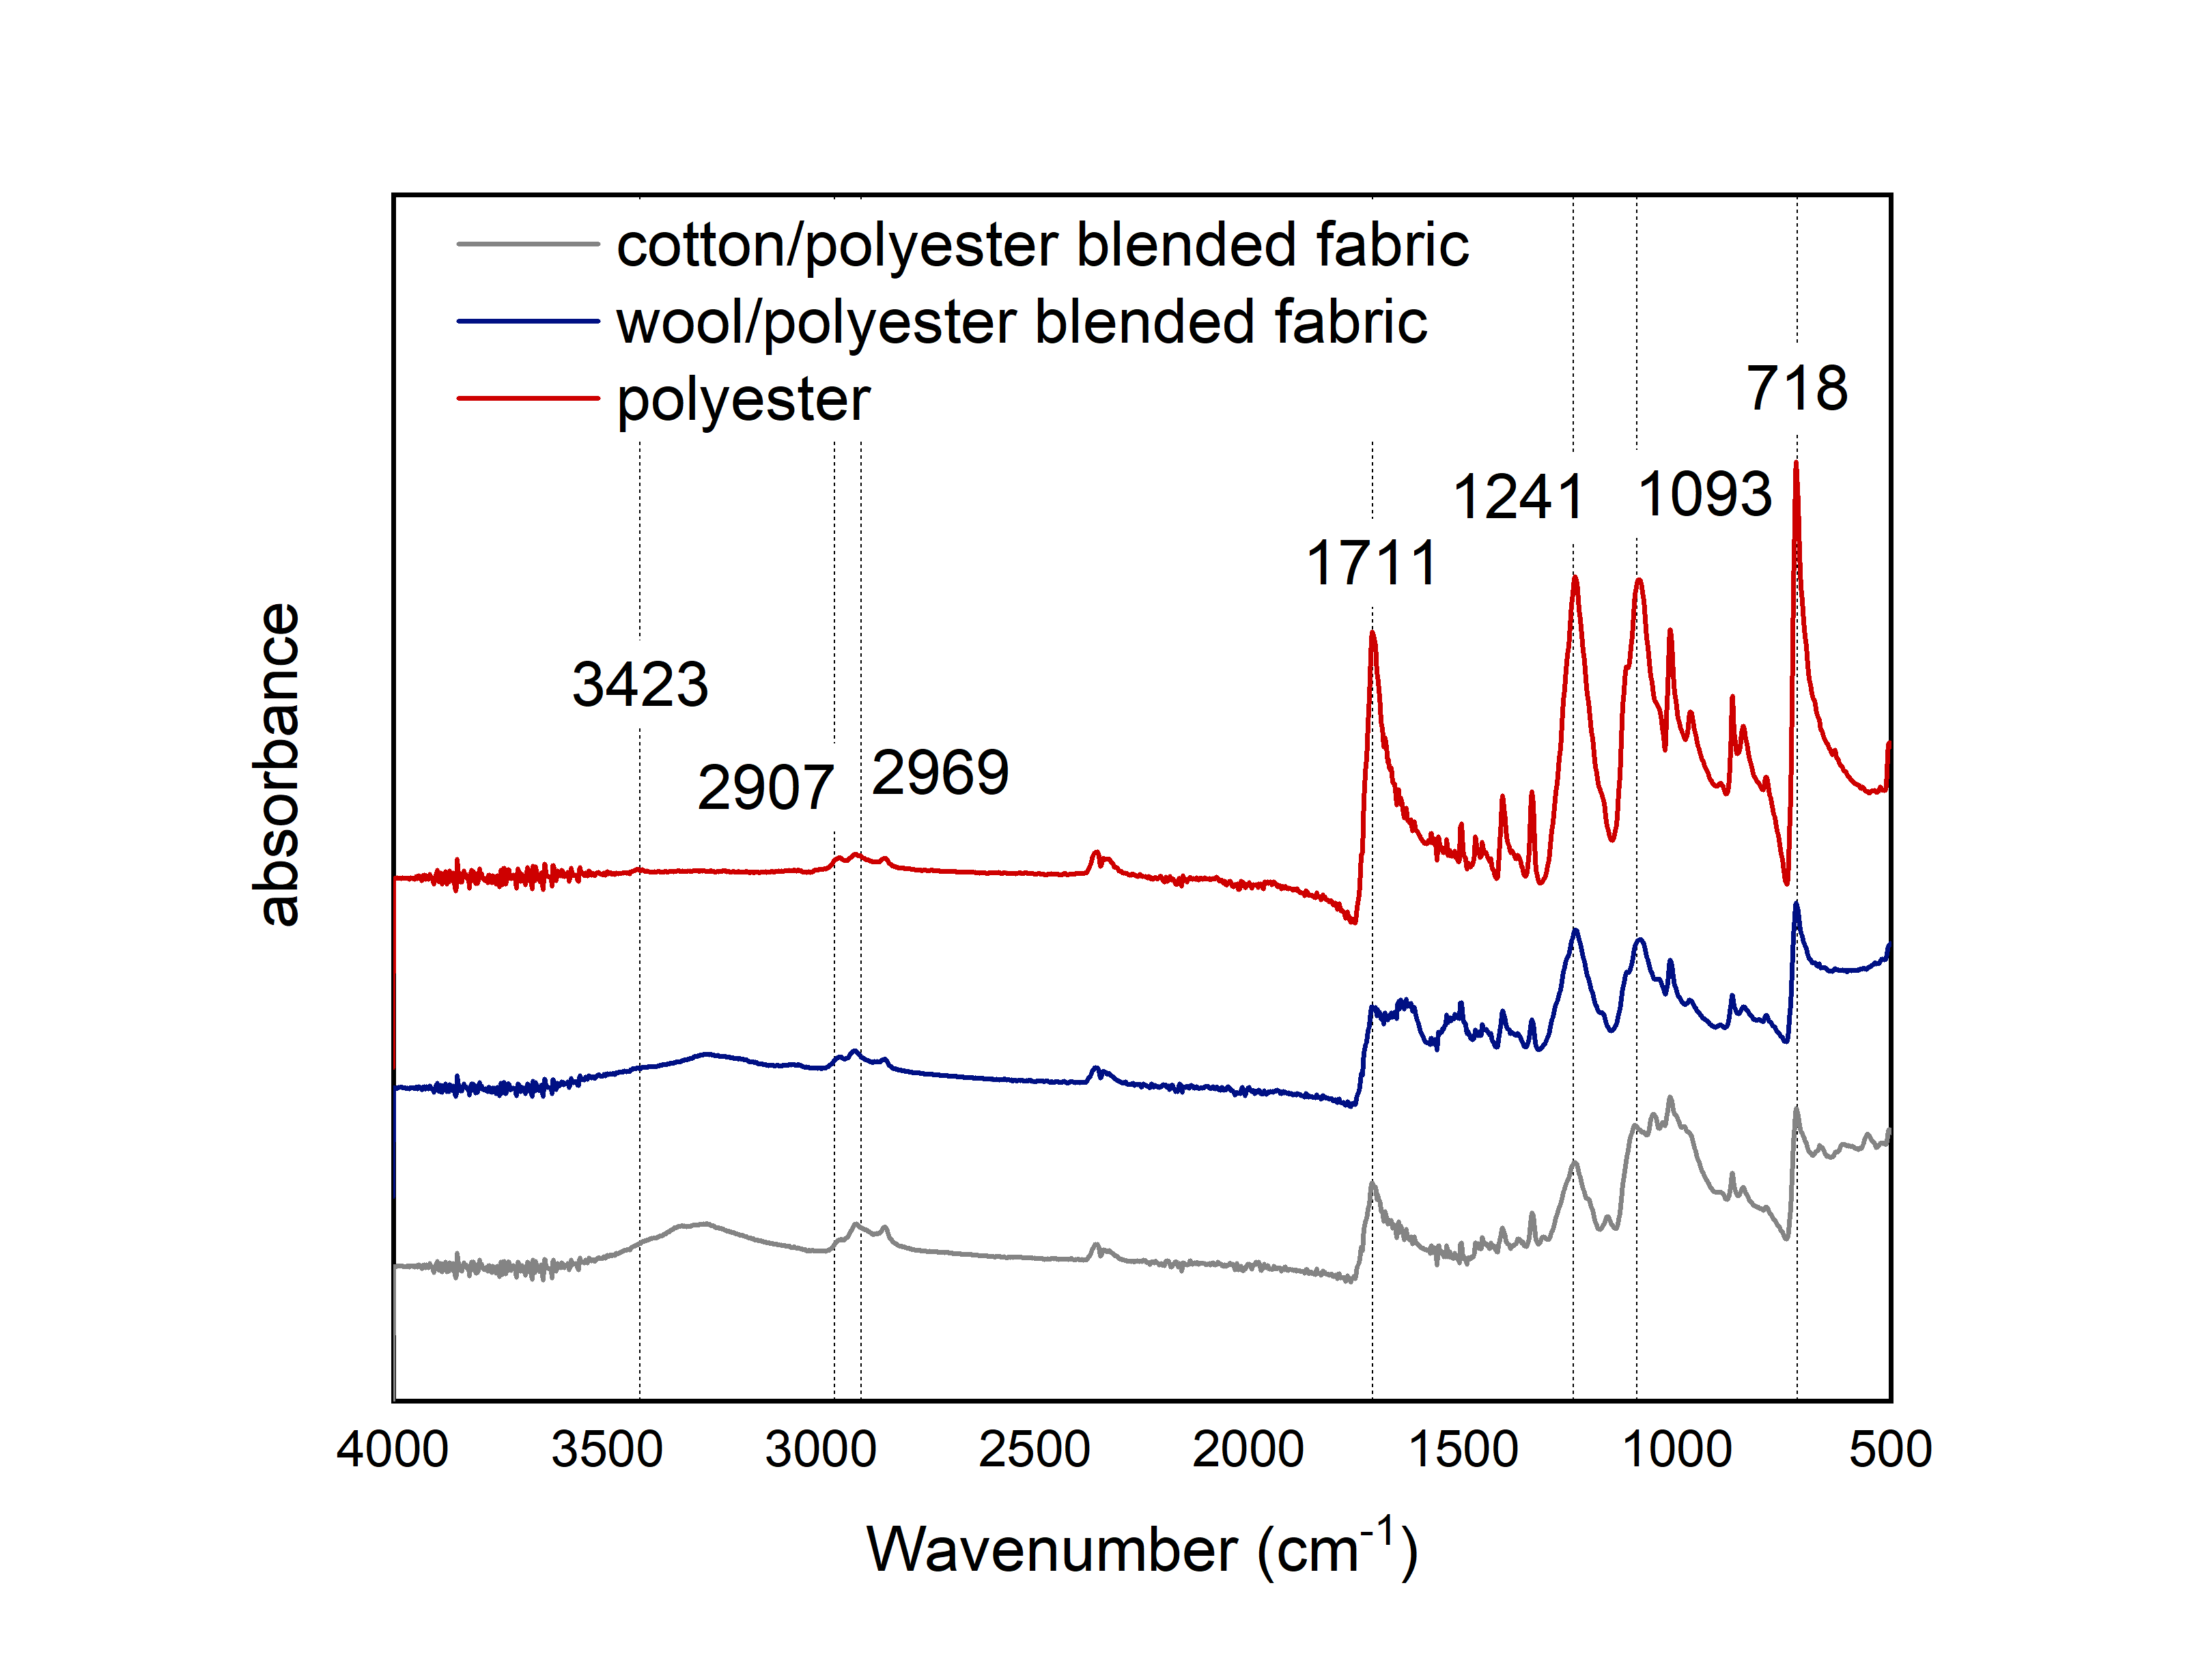


**Supplementary Figure 2.** FTIR spectra of cotton/polyester blended and wool/polyester blended fabrics before and after dissolution.

**Supplementary Figure 3.** Dissolution rate of cotton in [BMIM][Cl] with different temperature (**a**), dissolution time (**b**) and pre-treatment time (**c**). The pre-treatment process was operated by soaking fabric into water with different duration and dried before dissolution.

**
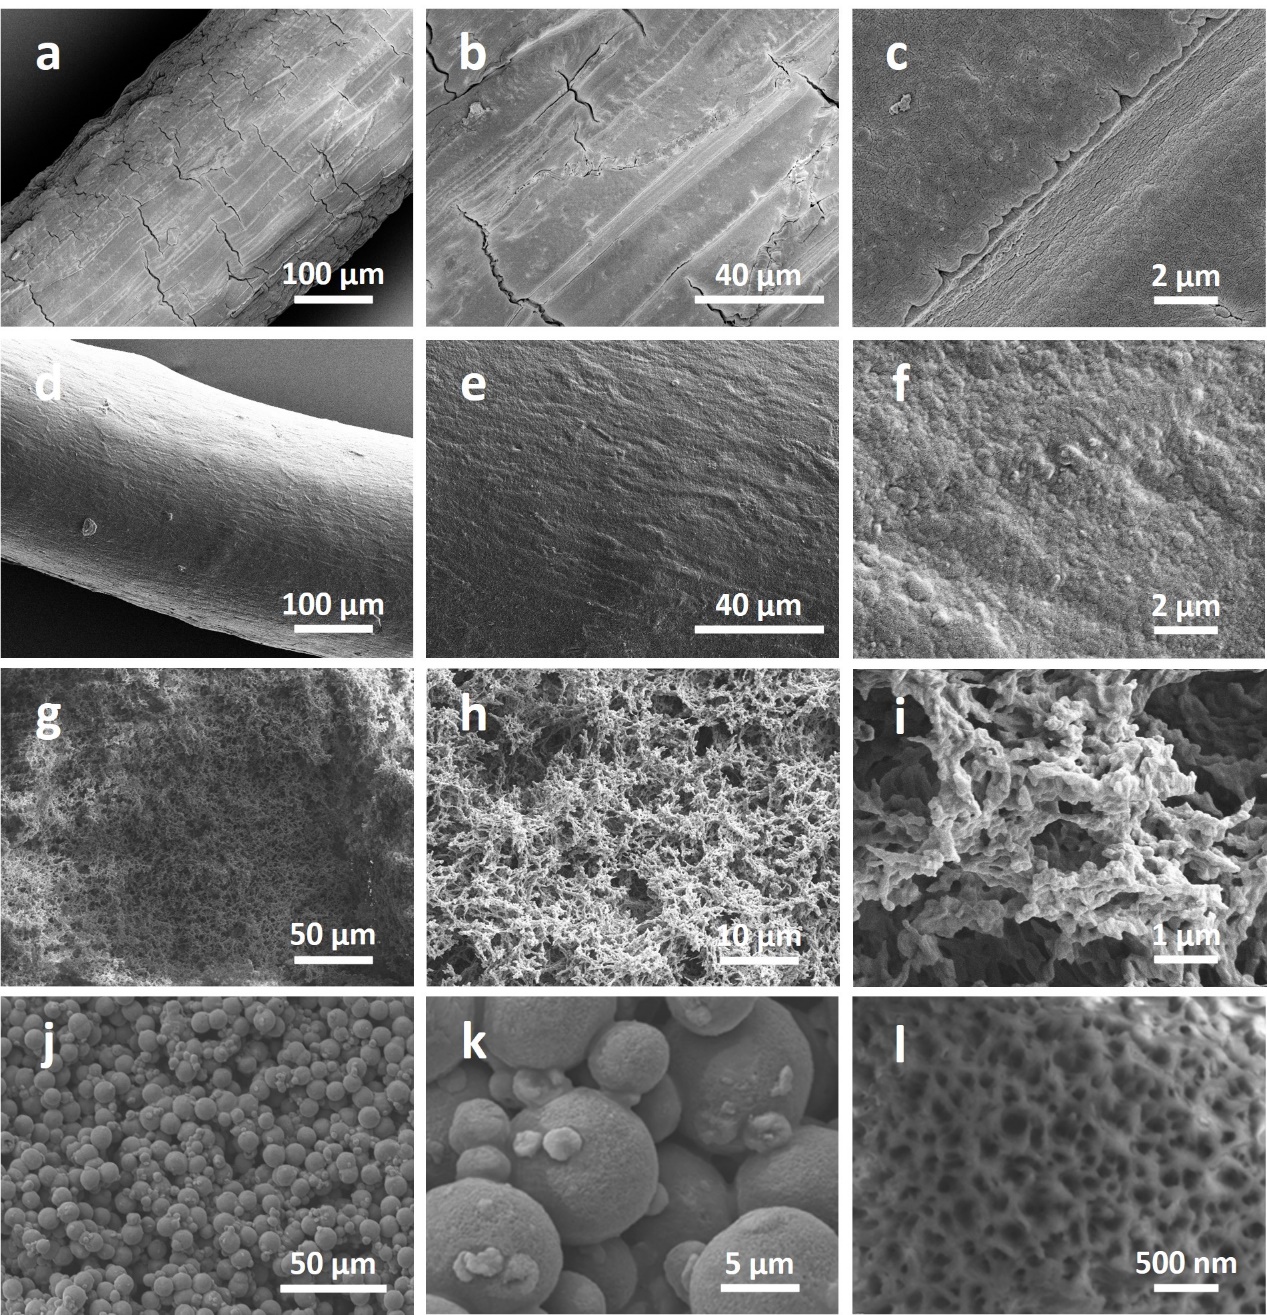
**

**Supplementary Figure 4.** **a, b, c,** SEM images of regenerated acrylic fibre from [BMIM][Cl]. **d, e, f,** SEM images of regenerated cellulose/wool keratin (w/w=1/3) composite fibre from [BMIM][Cl]. **g, h, i,** SEM images of freeze-dried regenerated wool keratin hydrogel. **j, k, l,** SEM images of regenerated cellulose microspheres.

**
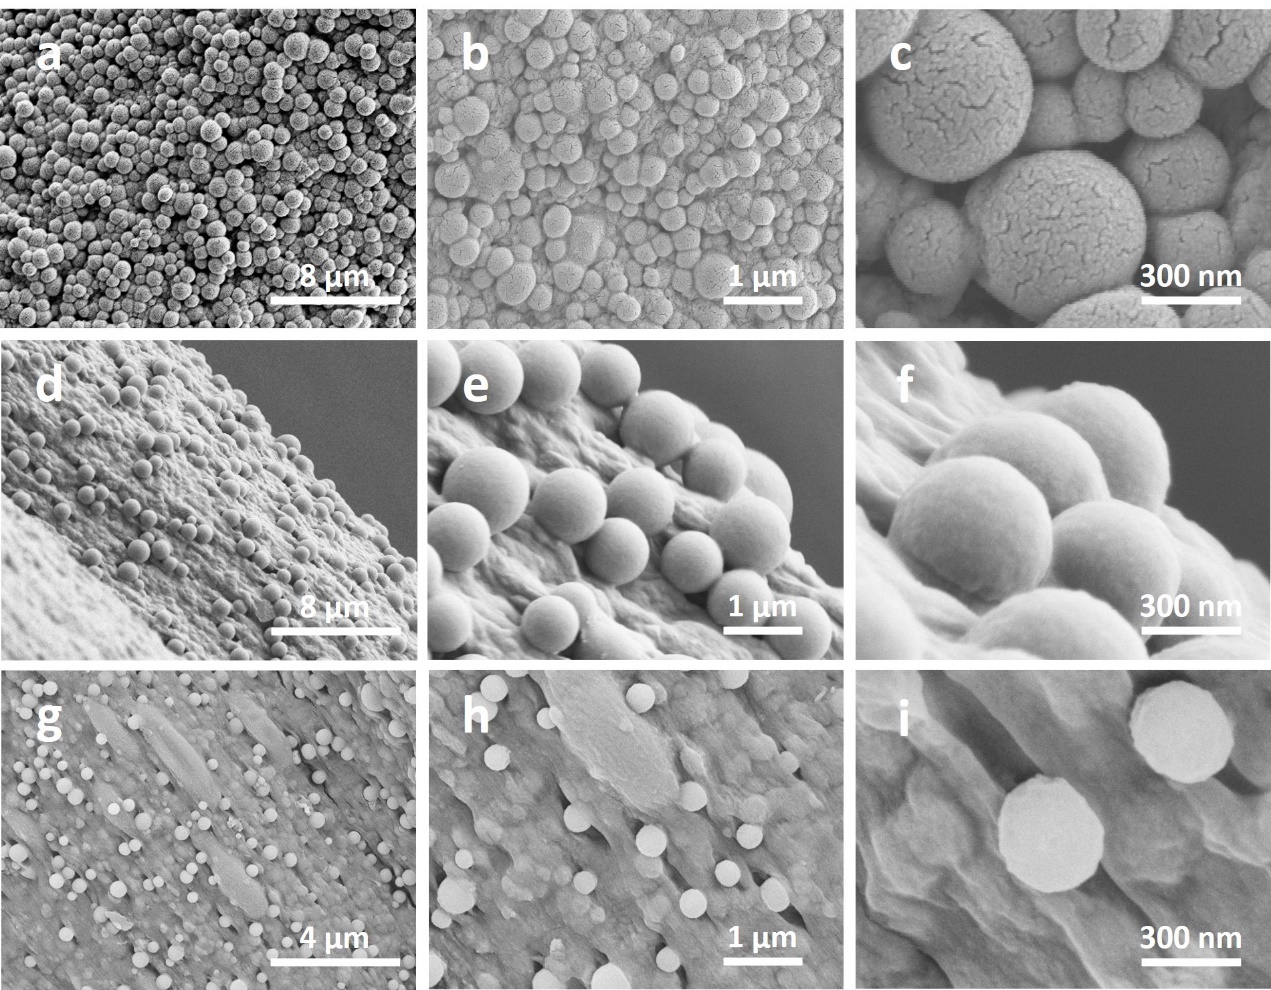
**

**Supplementary Figure 5.** **a-c,** SEM images of regenerated cellulose/wool keratin (w/w=1/1) composite fibre from [MMIM][DMP] with relatively lower spinning speed. **d-f,** SEM images of anterior part of regenerated cellulose/wool keratin (w/w=1/1) composite fibre from [MMIM][DMP] with relatively higher spinning speed. **g-i,** SEM images of posterior part of regenerated cellulose/wool keratin (w/w=1/1) composite fibre from [MMIM][DMP] with relatively higher spinning speed.


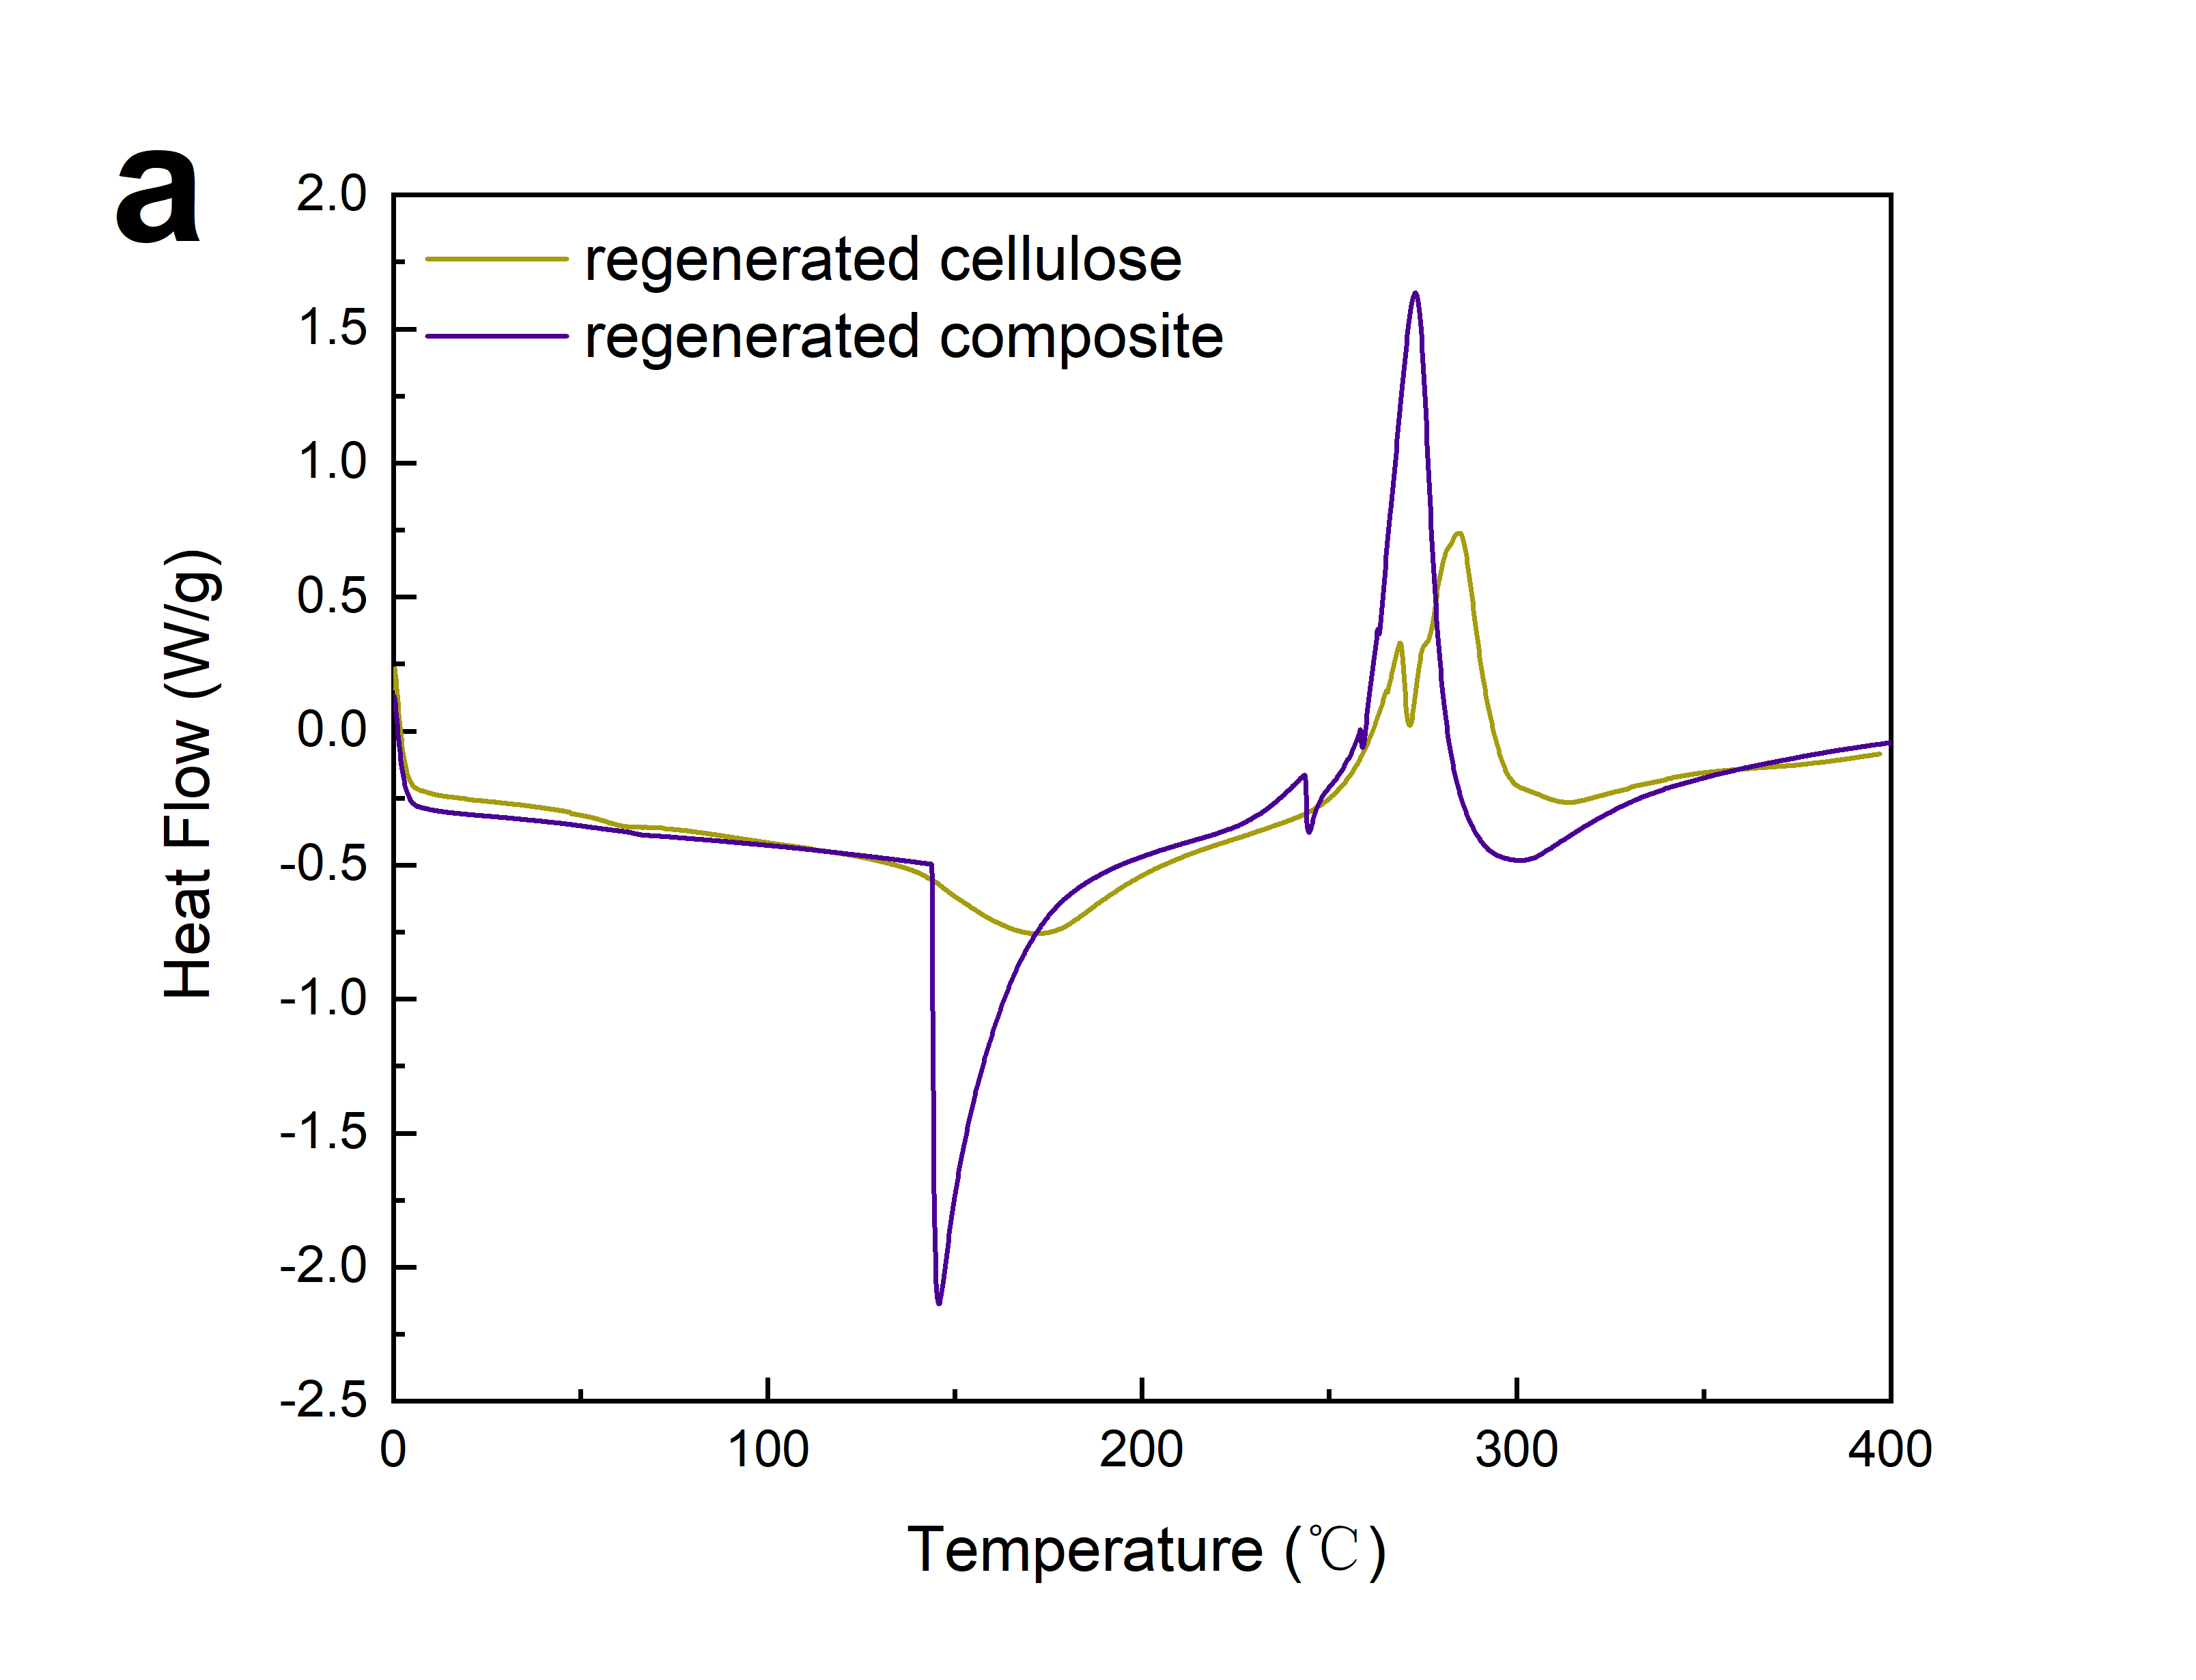

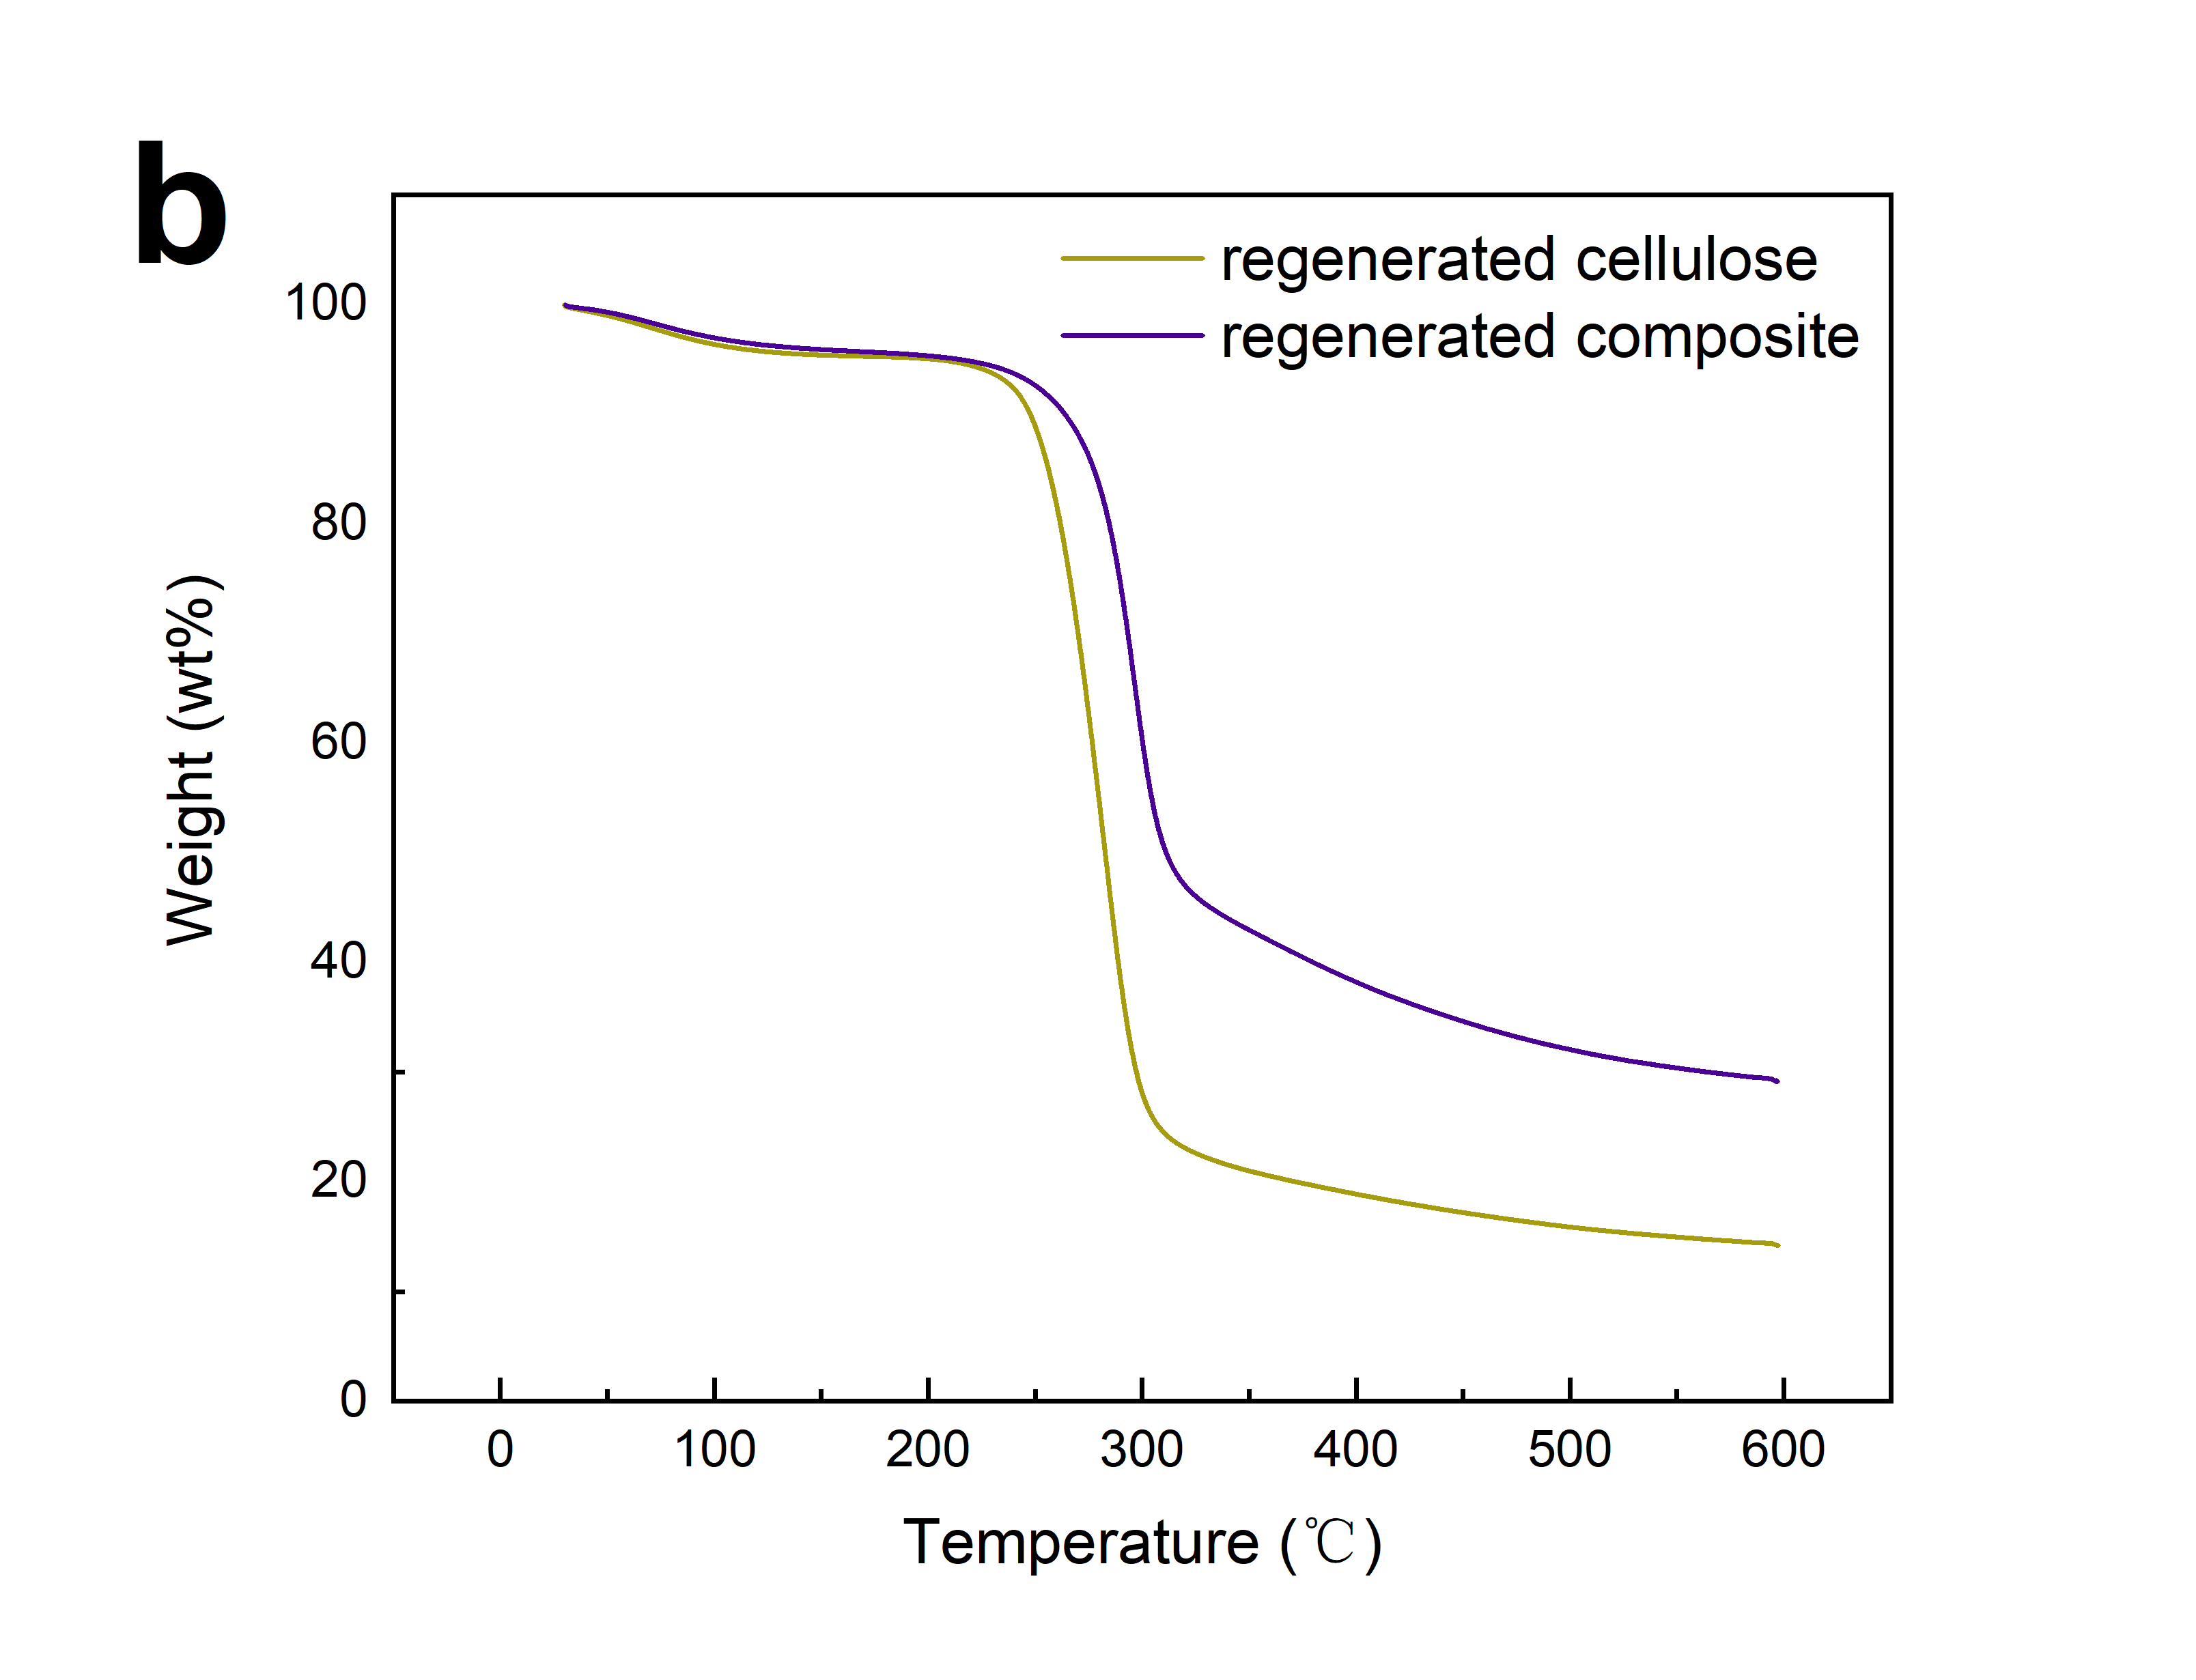


**Supplementary Figure 6.** DSC **(a)** and TGA **(b)** plots relative to regenerated cellulose fibre and regenerated cellulose/wool keratin (w/w=1/1) composite fibre as measured under nitrogen atmosphere.


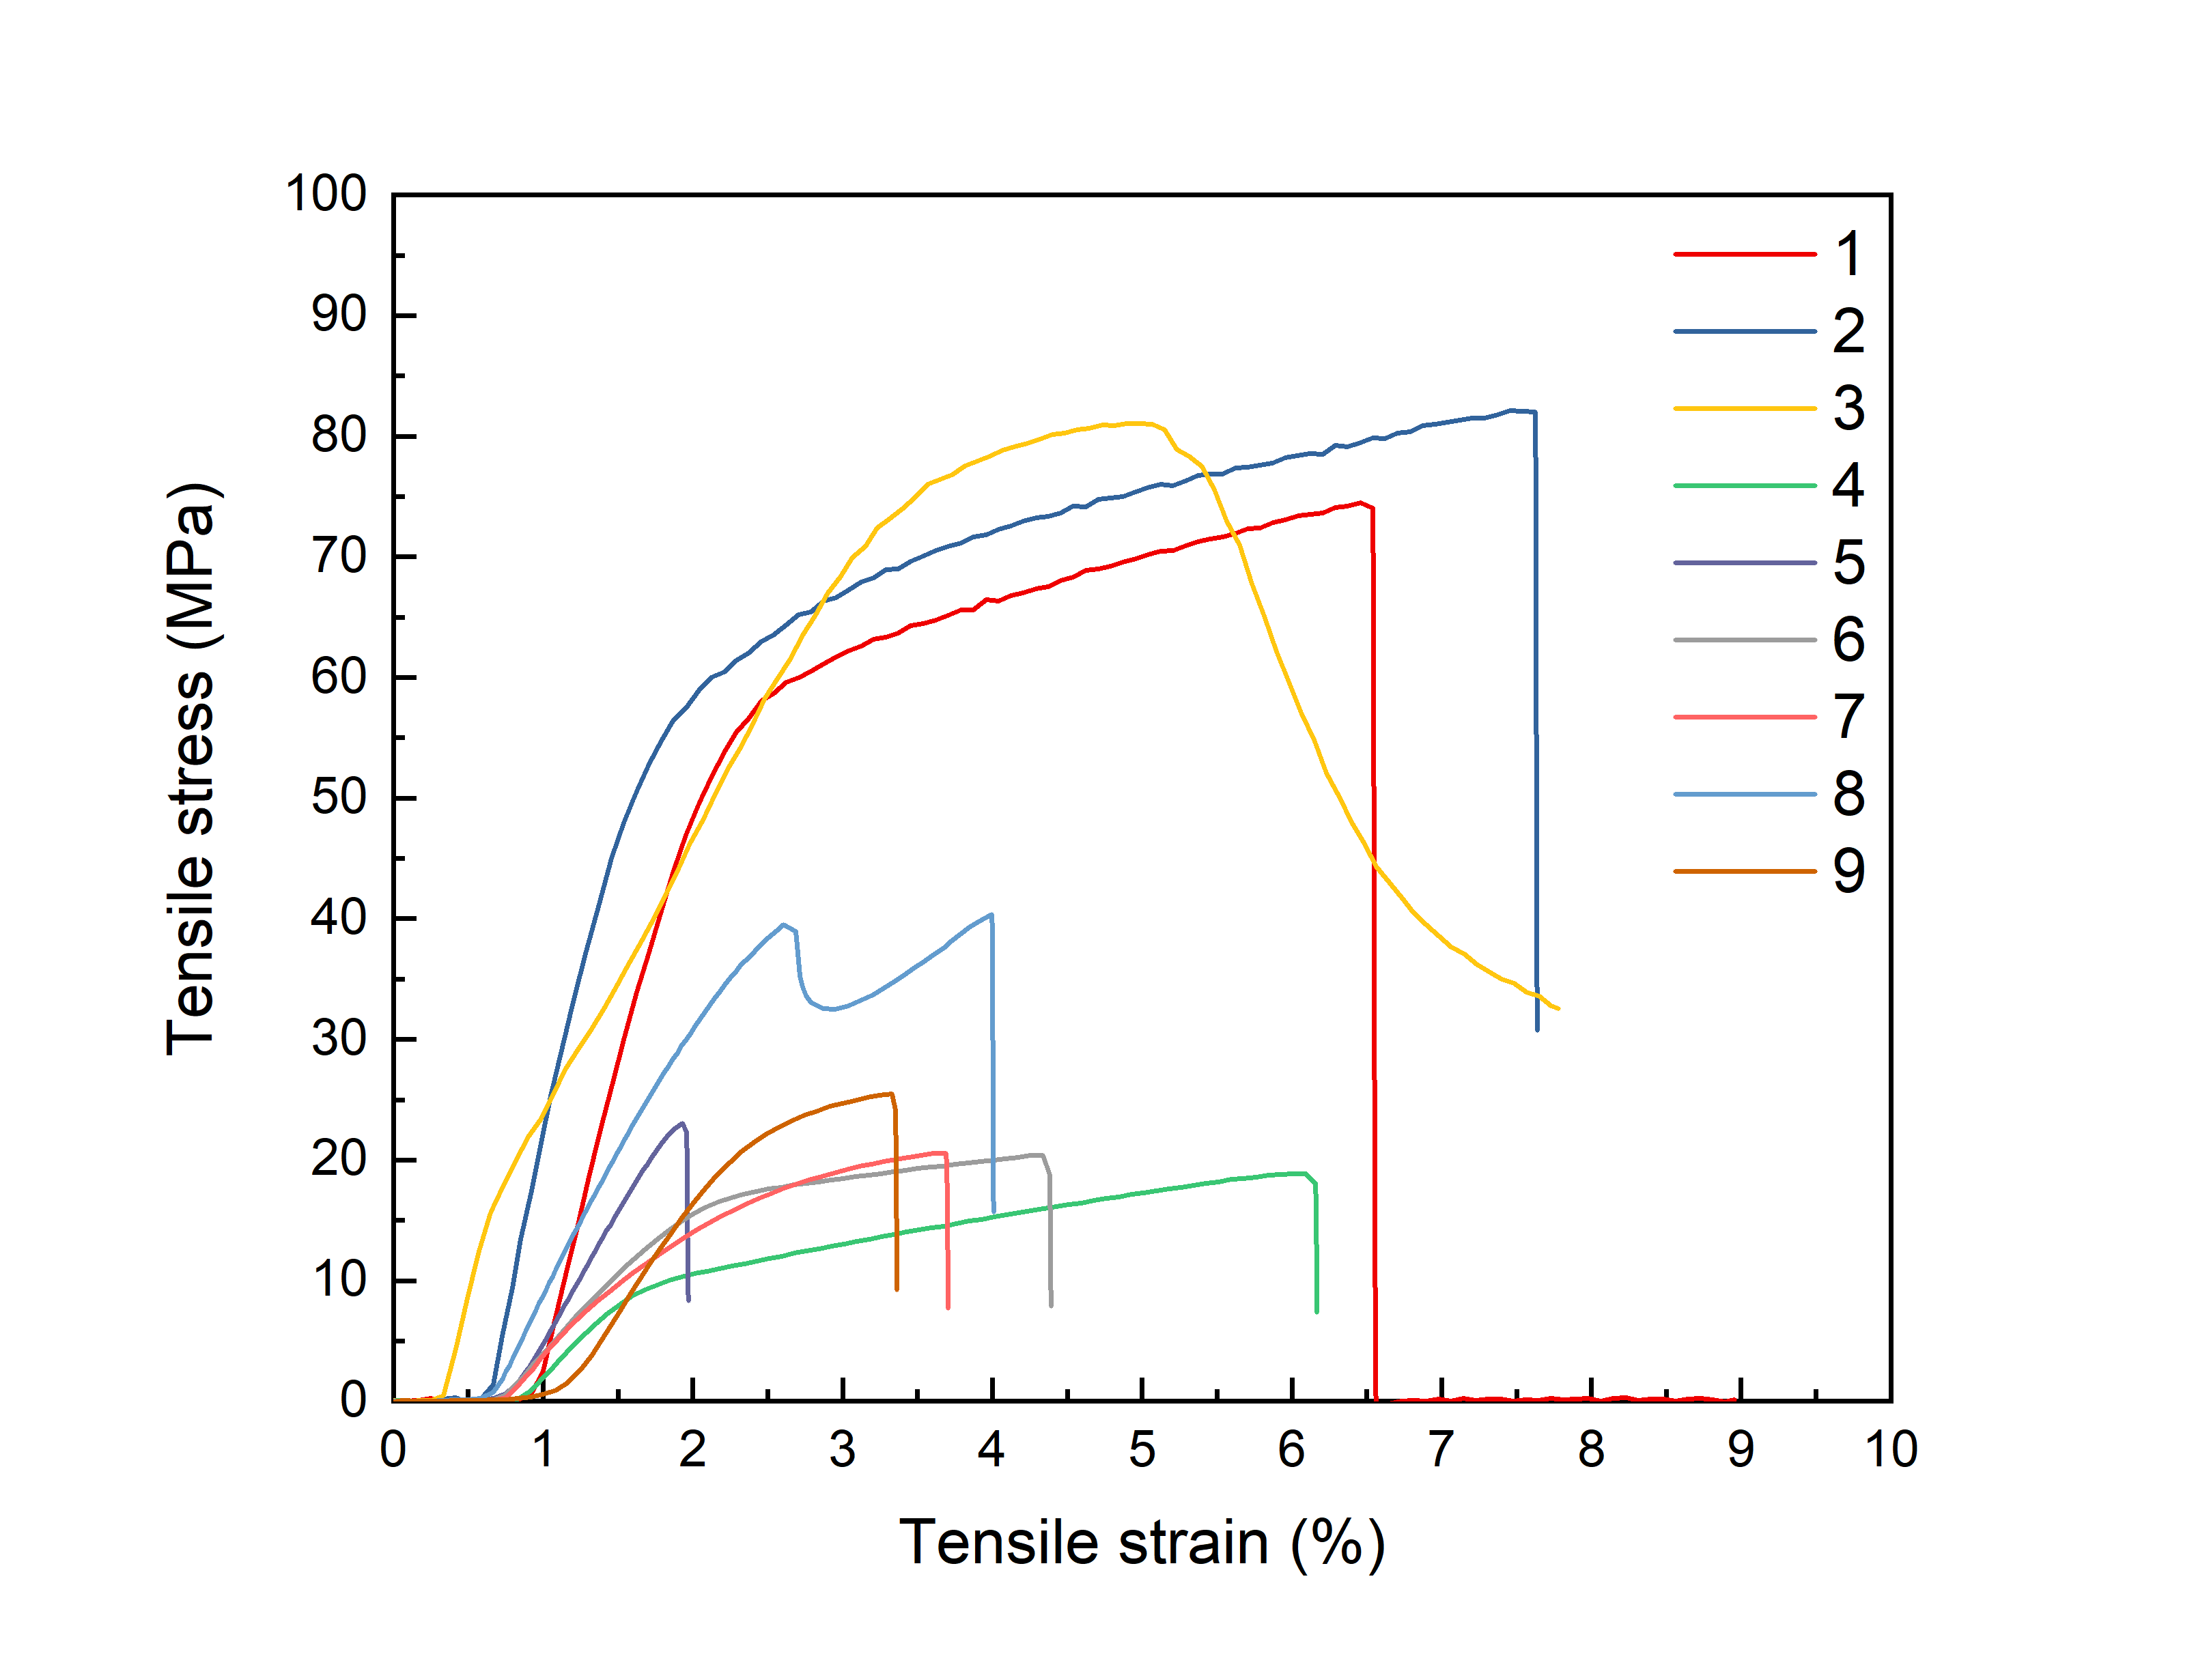


**Supplementary Figure 7.** Respective stress-strain curves of the regenerated cellulose fibre (sample 1-3) and cellulose/wool keratin composite fibre (sample 4-9).

**Supplementary References:**

1. Textiles: Material-Specific Data. *United States Environmental Protection Agency* (2017).

2. Sandin, G. & Peters, G. M. Environmental impact of textile reuse and recycling e A review. *J. Clean. Prod.* **184**, 353–365 (2018).
